# Supplementary material
Source: PubMed Central journal article supplement (PMC8321574)

1 **Supplemental Methods**

2 **Chronic inflammatory pain model**

3 For chronic inflammatory pain model, unilateral injection of complete  
4 Freund's adjuvant (20  $\mu$ l) (CFA) was performed into the intraplantar surface of  
5 mouse hindpaw, as described previously. Behavioral tests including pain  
6 sensitivity, EPM, TST and SPT were conducted before and at 7d, 14d after CFA  
7 injection. Western blotting was performed to examine the changes of Lamb1 in  
8 the ACC at 14 d following CFA inflammation.

9

10 **Chronic CORT and chronic restraint stress model**

11 For chronic CORT exposure experiments, mice were exposed to 0.1 mg/ml  
12 CORT (dissolved by ethanol to 10 mg/ml and added in animal drinking water)  
13 for 21 d. A control group was exposed to regular drinking water with 1% ethanol.  
14 For chronic restraint stress experiments, mice were restrained in tubes full of  
15 holes for ~4 h per day for successive 21 d. Except for these 4 h, mice had  
16 regular activity and diet for the remainder of the day. A control group had gentle  
17 handling for ~15 min per day for 21 d. EPM, TST and SPT test were performed  
18 at 21 d after chronic CORT exposure and chronic restraint stress, respectively.  
19 Subsequently, western blotting was performed to examine the changes of  
20 Lamb1 in the ACC in two depression models.

21

22 **Behavioral analyses**

1 All mice were allocated randomly in experimental group. Before behavioral  
2 tests, mice were allowed to acclimatize to the behavioral testing room for 3 days  
3 and in individual test compartments for at least 1 h. All testing was conducted  
4 in a blinded manner.

5 **Mechanical allodynia:** Mechanical withdrawal threshold testing (von Frey test)  
6 was conducted using calibrated von Frey filaments ranging from 0.008 - 2.0 g  
7 (0.008, 0.02, 0.04, 0.07, 0.16, 0.40, 0.60, 1.0, 1.4 and 2.0 g) on an elevated  
8 mesh-bottomed platform (Danmic Global, CA, USA). Beginning with 0.008 g,  
9 filaments were applied to the lateral plantar surface with just enough force to  
10 bend the fiber and held for 1 s. A “positive response” to the von Frey mechanical  
11 stimuli was defined as an abrupt foot lift upon application of von Frey hairs.  
12 Each filament was applied 10 times and the paw withdrawal response  
13 frequency was recorded. The force of a particular filament required to elicit 50%  
14 frequency of paw withdrawal was expressed as the mechanical threshold.

15 **Thermal nociception:** This experiment was performed using a device (IITC  
16 model 400, Woodland Hills, CA, USA) to identify thermal sensitivity of mice.  
17 Mice were placed in the individual test compartments on a temperature-  
18 controlled glass platform kept to 30°C and the lateral plantar surface of hindpaw  
19 was stimulated with a radiant heat source (50 W halogen bulb) directed through  
20 an aperture. The time elapsed from initiation of the stimulus until paw  
21 withdrawal was recorded as paw withdrawal thermal latency. Each hindpaw  
22 was tested 5 times with 5-min intervals, and the withdrawal latency values

1 averaged. To avoid tissue damage by prolonged thermal stimuli, cut off latency  
2 was set as 20 s.

3 **Open field test (OFT):** All tests were performed during the dark phase, and the  
4 light intensity was controlled in the same condition. The open field chamber was  
5 a  $50 \times 50 \times 40 \text{ cm}^3$  box, and the mice were placed into a corner area at the  
6 start of the test. The activity of the mouse was video-recorded for 10 min.  
7 Between sessions, the chamber was thoroughly cleaned with 70% ethanol to  
8 remove residual odors. The parameters measured included the distance and  
9 the time traveled in the center area and the total distance moved. The zone  
10 crossings were analyzed with SMART v.3.0 software (Panlab Harvard  
11 Apparatus, Newbury Park, CA, USA).

12 **Elevated plus-maze (EPM) test:** All tests were performed during the dark  
13 phase, and the light intensity was controlled in the same condition. This test  
14 was performed in a maze consisting of two open arms ( $30 \times 5 \text{ cm}^2$ ) and two  
15 enclosed arms ( $30 \times 5 \times 30 \text{ cm}^3$ ) that extended from a central platform ( $5 \times 5$   
16  $\text{cm}^2$ ) at  $90^\circ$ . The mice were placed into the central platform facing an open arm  
17 at the start of the test. The activity of the mouse was video-recorded for 5 min.  
18 Between animals, the maze was thoroughly cleaned with 70% ethanol to  
19 remove residual odors. The parameters measured included the distance and  
20 the time traveled in the open arm area and the total distance moved. The zone  
21 crossings were analyzed using SMART v.3.0 software.

22 **Tail suspension test (TST):** Mice were suspended about 15 cm from the top

1 of a compartment using lab tape and video-recorded for 6 min. Meanwhile, a  
2 small plastic tube was placed around the tail to avoid tail climbing. The  
3 behavioral apparatus was thoroughly cleaned with 70% ethanol to remove  
4 residual odors between animals. Immobility time was calculated with consistent  
5 criteria by observer blind to the experimental condition of the animals.

6 **Sucrose preference test (SPT):** Before the test, each mouse was temporarily  
7 single-housed in a cage, and trained to adapt to 1% sucrose solution (W/V):  
8 two bottles of 1% sucrose solution were placed in each cage. After 24 h, one  
9 sucrose bottle was replaced with a bottle of water for 24 h. Then mice were  
10 deprived of water and food for 24 h. After that, a bottle of 1% sucrose solution  
11 and a bottle of water were placed in each cage for 12 h. Sucrose solution and  
12 water consumption were calculated by weighing the bottle before and after 12-  
13 h testing session, and the sucrose preference was calculated as follows: sucrose  
14 preference = sucrose consumption / (sucrose consumption + water  
15 consumption).

16

### 17 ***Quantitative RT-PCR***

18 Contralateral ACC tissues from sham and SNI-treated mice (7d, 28d, 56d post  
19 SNI) were harvested and shock-frozen on dry ice. Total RNA was extracted from  
20 cultured cortical neurons or ACC tissue using TRIzol Reagent (Invitrogen) in  
21 accordance with the manufacturer's protocol. RNA extracts were reverse-  
22 transcribed by PrimeScript RT Master Mix (TaKaRa, #RR036A, Dalian, China)

1 at 37 °C for 15 min and 85 °C for 5 s. Targets were then amplified in triplicate  
2 by quantitative RT-PCR using TB Premix Ex Taq (#RR820A, TaKaRa) on a  
3 StepOnePlus Real-Time PCR System (Applied Biosystems, Foster City, CA,  
4 USA), normalized to GAPDH, and quantified by the comparative cycle threshold  
5 method ( $2^{\Delta\Delta CT}$ ). Primer sequences was used as follows. *Lamb1* forward:  
6 CAGTGCCAGTGCCGTCCTAATG, reverse:  
7 CCAGTGATCGCATCGCAGAAGG; *GAPDH* forward:  
8 TGTGTCCGTCGTGGATCTGA; reverse: TTGCTGTTGAAGTCGCAGGAG.

9

## 10 **Western blotting**

11 Contralateral ACC tissues were dissected from brain of mice subjected to  
12 sham or SNI surgery (7d, 28d and 56d post SNI) and lysed using RIPA lysis  
13 buffer (50 mM Tris-HCl, pH 7.4, 150 mM NaCl, 5 mM EDTA, 1% Triton X-100,  
14 0.5% sodium deoxycholate, 0.1% SDS) and standard protease inhibitors by  
15 sonication on ice, and centrifuged at 12,000 rpm for 10 min. Total protein was  
16 measured by BCA Protein Assay Kit (#23225, Thermo Scientific, Waltham, MA,  
17 USA), mixed with 5× SDS-PAGE loading buffer (#CW0027, CWBIO, Beijing,  
18 China), and heated at 100 °C for 10 min. Protein samples were resolved by  
19 SDS-PAGE, and immunoblotted with corresponding antibodies (Supplementary  
20 table 1). Proteins were visualized with enhanced chemiluminescence detection  
21 methods. The scanned images were quantified using ImageJ software. Specific  
22 bands for each protein were normalized to its respective  $\beta$ -actin or GAPDH

1 loading control.

2 For extraction of membrane proteins, cells were lysed using Plasma  
3 membrane protein isolation and cell fraction kit (#SM-05, Invent, Beijing, China)  
4 in accordance with the manufacturer's protocol, and membrane protein were  
5 immunoblotted with appropriate antibodies (Supplementary table 1).

6 In a subset of experiments for confirming AAV virus injection confined to  
7 ipsilateral ACC, some adjacent cortical and subcortical regions were dissected  
8 and lysed including PrL, RSG, LSD, M2 except injected ACC.

9

## 10 **Immunofluorescence labelling**

11 Wildtype mice were anesthetized with pentasorbital sodium and transcardially  
12 perfused with saline followed by 4% paraformaldehyde. Brain tissues were  
13 removed, postfixed overnight in 4% paraformaldehyde, and cryoprotected in 30%  
14 sucrose at 4 °C until the tissue sank to the bottom of the container. Serial  
15 sections (16 µm in thickness) were cut on a cryostat and were immunostained  
16 with appropriate antibodies (Supplementary table 1). Briefly, sections were  
17 incubated with a solution containing 0.3% Triton X-100 and 5% bovine serum  
18 albumin (BSA) for 1 h at room temperature. Sections were then incubated with  
19 primary antibodies over night at 4 °C. After three washes with PBST, the  
20 secondary antibodies were applied for 2 h at room temperature. For Phalloidin  
21 staining, the sections or cultured cells were stained with SF633 Phalloidin (200  
22 U/ml, 1:100) for 20 min. The nuclei were stained by hoechst (1:1000). All

1 images were captured with an Olympus confocal microscope (Olympus  
2 FV1200, Ishikawa, Japan).

3

#### 4 **Cortical cell culture**

5 Cortical neurons were prepared from E17-E19 mice cortex. Briefly, pregnant  
6 mice were anesthetized with 1% pentasorbital sodium via intraperitoneal  
7 injection, and pups were removed under pathogen-free condition. Cortices  
8 were isolated and cut into pieces under ice cold condition. After that, the  
9 dissociated cells with 0.05% trypsin were plated onto dishes or glass coverslips  
10 coated plates precoated with poly-L-lysine. The cells were cultured in  
11 Neurobasal (#10888022, Invitrogen) with B27 supplement and 2 mM glutamate.  
12 Three days later, the cells were infected with LV-shLamb1-EGFP or LV-  
13 Scrambled shRNA-EGFP for 7 d, and fixed or collected for further study.

14

#### 15 **Pharmacological rescue experiments**

16 The ACC from sham-treated or 8 w post-SNI mice was implanted with bilateral  
17 26 gauge (Ga) stainless steel guide cannula (0.8 mm separation, RWD Life  
18 Science) according to the above coordinates and fixed with dental cement. The  
19 removable obturators (33 Ga OD) at the full length of the guide cannula were  
20 inserted into the guide cannula to limit obstruction. After surgery, animals were  
21 housed separately and recovered for ~7 d. For microinjections, mice were  
22 lightly anesthetized using isoflurane and obturators were removed. Sterile 33

1 Ga microinjection needles were connected to two 10  $\mu$ l microsyringes (Hamilton,  
2 Bonaduz, Switzerland) via PE-50 tube. 600 nl pyrintegrin (0.1, 1 or 10 mM) or  
3 0.9% saline as vehicle was infused per side over a 2 min period. Then, the  
4 microinjection needles were kept in place for additional 10 min for drug diffusion.  
5 After the diffusion, the injection needle was removed and the obturator was  
6 replaced. Behavioral tests were performed at ~1 h after microinjection.

7

### 8 **Stereotaxic surgery**

9 Mice were anesthetized with 1% pentasorbital sodium via intraperitoneal  
10 injection, and their heads were fixed in a stereotactic frame (RWD Life Science  
11 Inc., Shenzhen, China). Their eyes were applied to erythromycin to prevent  
12 corneal drying. All skull measurements were made relative to Bregma, and virus  
13 was injected into the ACC at a rate of 50 nl/min using a 10- $\mu$ l microsyringe  
14 (GaoGe, Shanghai, China) with a microelectrode to deliver the virus using a  
15 microsyringe pump (Kd Scientific, Holliston, MA, USA). After viral injection, the  
16 microelectrode was kept in place for 10 min to allow diffusion of the virus. The  
17 stereotaxic coordinates for ACC injection were anterior posterior (AP) 1.00,  
18 medial lateral (ML) 0.25 and dorsal ventral (DV) 1.90 mm. For Lamb1  
19 knockdown experiments, 300 nl of AAV2/9-U6-Lamb1 shRNA-CMV-EGFP or  
20 AAV2/9-U6-scrambled shRNA-CMV-EGFP was unilaterally injected into the  
21 right ACC. For calcium imaging in Lamb1 knockdown mice, 500 nl mixture of a  
22 1 : 2 ratio of AAV2/9-CaMKIIa-GCaMP6s and AAV2/9-U6-Lamb1 shRNA-CMV-



1 mCherry or AAV2/9-U6-scrambled shRNA-CMV-mCherry was injected  
2 unilaterally into the right ACC, and optical fiber (230  $\mu$ m optical density (OD),  
3 0.37 numerical aperture (NA), Thorlabs) were implanted in the injected ACC  
4 (from Bregma: AP +1.00 mm, ML 0.25 mm, DV 1.7 mm). In a subset of  
5 experiments for integrin  $\beta$ 1 knockdown, 300 nl of AAV2/9-U6-Lamb1 shltgb1-  
6 CMV-EGFP or AAV2/9-U6-scrambled shRNA-CMV-EGFP was unilaterally  
7 injected into the right ACC. Data were excluded in experiments when the viral  
8 injections were inaccurate.

9

## 10 **Golgi staining**

11 Golgi-Cox staining was performed as described previously. In brief, mice  
12 were subjected to sham or SNI surgery, which was followed by contralateral  
13 intracingulate injection of AAV-shLamb1 or AAV-scrambled shRNA at 8 w after  
14 surgery. After virus transfection for 4 w, the brain tissue was freshly removed,  
15 washed in distilled water, and immersed in Golgi-cox solution (5% potassium  
16 chromate, 5% potassium dichromate, and 5% mercuric chloride) for fixation,  
17 and maintained in the dark at room temperature for 2-3 d. Then the brains were  
18 transferred to a fresh Golgi-Cox Solution for 14 d and further to 30% sucrose  
19 for 2 d. Coronal sections containing ACC (150  $\mu$ m) were cut on a vibratome and  
20 mounted on gelatinized glass slides. For staining, brain sections were washed  
21 in deionized water for 1 min, placed in 50%  $\text{NH}_4\text{OH}$  for 30 min, and  
22 subsequently in fixing solution (Kodak; Rochester, NY, USA) for an additional

1 30 min. The sections were then incubated in 5% sodium thiosulfate for 10 min.  
2 After washing with distilled water, sections were dehydrated, cleared and  
3 coverslipped. The images were captured using an FV1200 confocal microscopy  
4 (Olympus, Ishikawa, Japan) and Imaris software (v.7.7.1, Bitplane, Switzerland)  
5 was used to reconstruct neuronal dendritic arbors and dendritic spines.  
6 Dendritic length, branching complexity and branch-point locations in a series of  
7 concentric circles (at 10- $\mu\text{m}$  radius increments from the soma) throughout the  
8 whole dendritic arbor were quantified for the Sholl analysis. Consistent with  
9 previous studies, further high-resolution analysis enabled classifying synaptic  
10 spines into long thin, filopodia, stubby and mushroom subtypes. Dendritic spine  
11 classification was then completed in the Imaris spine classification module. In  
12 brief, spines with length  $< 1 \mu\text{m}$  are categorized as stubby spines, those with  
13 length  $< 3 \mu\text{m}$  and max head width  $>$  mean of neck width\*2 are categorized as  
14 mushroom spines, spines with mean of head width  $\geq$  mean of neck width are  
15 categorized as long thin type, filopodia spines are those except the above three  
16 types.

17 The sections were observed under the bright field of confocal microscope  
18 FV1200, images were taken by z-stack scanning with the excitation wavelength  
19 of 405 nm, and then the virtual color was converted into green color.

20

1 **Supplemental figure legends:**

2 **Supplemental Figure 1:** Spared nerve injury induces exaggerated pain  
3 response. (A) Comparison of mechanical threshold to von Frey hairs in the  
4 ipsilateral hindpaw at different time points in mice subjected to sham operation  
5 or SNI. Friedman's *M* test. (B, C) Typical examples showing response  
6 frequency to von Frey hairs (B) and mechanical threshold (C) at 7d after SNI  
7 surgery as compared to sham group. Two-tailed unpaired separate variance  
8 estimation t-test. (D, E) Comparison of thermal latency to radiant heat  
9 stimulation in the ipsilateral hindpaw at different time points in mice subjected  
10 to sham operation or SNI. Friedman's *M* test. (E) Typical examples showing  
11 thermal hyperalgesia at 7d after SNI surgery as compared to sham group. Two-  
12 tailed unpaired t-test. (F) Time course of mechanical allodynia observed in  
13 contralateral hindpaw after SNI surgery as compared to sham group.  
14 Friedman's *M* test. (G, H) Typical stimulus-response curve (G) and mechanical  
15 threshold (H) in contralateral hindpaw at 7d after SNI operation in comparison  
16 with sham group. Two-tailed unpaired t-test. (I) Comparison of thermal latency  
17 in the contralateral hindpaw at different time points in mice subjected to SNI  
18 operation or sham. Friedman's *M* test. (J) Typical examples showing thermal  
19 latency at 7d after SNI surgery as compared to sham group. Two-tailed  
20 unpaired t-test.  $n = 12$ . Data are presented as mean  $\pm$  S.E.M. See  
21 Supplemental Table 2 for detailed statistical information.  $**P < 0.01$ ,  $****P <$   
22  $0.0001$ .

1

2 **Supplemental Figure 2:** Spared nerve injury induces the anxiodepressive-like  
3 behavior. (A-G) Representative trajectory (A) and quantitative summary of time  
4 staying (B, C), distance travelling (D, E) in the centre area as well as total  
5 distance (F, G) in the OFT paradigm in sham- and SNI-treated mice. Friedman's  
6 *M* test in (B) and (D), Two-tailed unpaired t-test in (C) and (G), Two-tailed  
7 unpaired separate variance estimation t-test in (E), Repeated measurement  
8 ANOVA in (F). (H-N) Representative trajectory (H) and quantitative summary  
9 of time staying (I, J), distance travelling (K, L) in the open arm as well as total  
10 distance (M, N) in the EPM paradigm in sham- and SNI-treated mice.  
11 Friedman's *M* test in (I), (K) and (M), Two-tailed unpaired separate variance  
12 estimation t-test in (J) and (L), Two-tailed unpaired t-test in (N). (O-Q) Duration  
13 of immobility in TST (O, P) and sucrose preference in SPT paradigm (Q) in  
14 sham- and SNI-treated mice. Repeated measurement ANOVA in (O). Two-  
15 tailed unpaired t-test in (P) and (Q).  $n = 10$ . Data are presented as mean  $\pm$   
16 S.E.M. See Supplemental Table 2 for detailed statistical information.  $*P < 0.05$ ,  
17  $**P < 0.01$ ,  $****P < 0.0001$ .

18

19 **Supplemental Figure 3:** The behavioral tests for mice subjected to RNA-  
20 sequencing in the contralateral ACC. (A-C) Response frequency to von Frey  
21 hairs (A) and mechanical threshold (B) as well as thermal latency to radiant  
22 heat stimulation (C) at 56 d following SNI surgery as compared to sham group.

1 Two-tailed unpaired separate variance estimation t-test in (B), Two-tailed  
2 unpaired t-test in (C). (D) Representative trajectory and quantitative summary  
3 of time staying, distance travelling in the centre area as well as total distance in  
4 the OFT paradigm in sham- and SNI-treated mice (56 d post surgery). Time  
5 and distance in centre area: Two-tailed unpaired t-test. Total distance: Two-  
6 tailed unpaired separate variance estimation t-test. (E) Representative  
7 trajectory and quantitative summary of time staying, distance travelling in the  
8 open arm as well as total distance in the EPM paradigm in sham- and SNI-  
9 treated mice (56 d post surgery). Two-tailed unpaired t-test. (F, G) Duration of  
10 immobility in TST (F) and sucrose preference in SPT paradigm (G) in sham-  
11 and SNI-treated mice. Two-tailed unpaired t-test.  $n = 3-4$ . Data are presented  
12 as mean  $\pm$  S.E.M. See Supplemental Table 2 for detailed statistical information.  
13 \* $P < 0.5$ , \*\* $P < 0.01$ , \*\*\* $P < 0.001$ , \*\*\*\* $P < 0.0001$ .

14

15 **Supplemental Figure 4:** Construction, verification of AAV2/9 expressing  
16 shLamb1 and specific virus injection confined to ACC, but not spreading into  
17 adjacent regions. (A) Schematic diagram showing construction of AAV2/9  
18 expressing shLamb1. (B, C) Knockdown efficiency of 3 *Lamb1* shRNAs at  
19 mRNA (B) and protein level (C) in cultured cortical neurons ( $n = 3$ ). mRNA:  
20 Kruskal-Wallis  $H$  test with Nemenyi multiple comparisons test. Protein: One-  
21 way ANOVA with Tukey's multiple comparisons test. (D) Schematic diagram  
22 showing experimental procedure for injection of Lamb1 shRNA-expressing

1 AAV2/9 into the ACC of C57BL/6 mice and behavioral testing. (E-H) Western  
2 blot analysis showing virus injection confined to ipsilateral ACC, but not  
3 spreading into the adjacent cortical and subcortical regions, i.e. PrL, RSG, LSD  
4 and M2 (n = 3). Two-tailed unpaired t-test. Data are presented as mean  $\pm$  S.E.M.  
5 See Supplemental Table 2 for detailed statistical information. \* $P < 0.05$ , \*\* $P <$   
6 0.01, \*\*\*\* $P < 0.0001$ .

7

8 **Supplemental Figure 5:** (A, B) Contralateral mechanical sensitivity was  
9 enhanced after Lamb1 knockdown in SNI (B) but not sham condition (A) (n =  
10 10). Mann-Whitney  $U$  test in (A), Two-tailed unpaired t-test in (B). (C)  
11 Contralateral thermal sensitivity was unaltered by Lamb1 knockdown in either  
12 sham- or SNI-treated state (n = 10). One-way ANOVA with Tukey's multiple  
13 comparisons test. (D, E) Quantitative summary showing time staying in the  
14 open arm (D) and total distance (E) in sham and SNI-treated mice (n = 10).  
15 Kruskal-Wallis  $H$  test with Nemenyi multiple comparisons test in (D). One-way  
16 ANOVA with Tukey's multiple comparisons test in (E). Data are presented as  
17 mean  $\pm$  S.E.M. See Supplemental Table 2 for detailed statistical information.  
18 \*\* $P < 0.01$ , \*\*\*\* $P < 0.0001$ .

19

20 **Supplemental Figure 6:** (A) Schematic diagram showing the experiment  
21 procedure for examination of dendritic processes and spine remodelling after  
22 Lamb1 knockdown using Golgi staining. (B) Representative confocal stacks

1 and three-dimensional reconstruction images of the basal dendrites of ACC  
2 pyramidal neurons obtained from mice expressing shLamb1 and scrambled  
3 shRNA in both sham and SNI conditions (n = 12-27). (C, D) Summary of spine  
4 density (C) and length (D) on the basal dendrites of ACC pyramidal neurons  
5 obtained from mice expressing shLamb1 and scrambled shRNA in both sham  
6 and SNI conditions (n = 12-27). Kruskal-Wallis *H* test in (C). One-way ANOVA  
7 with Tukey's multiple comparisons test in (D). (E) Summary of the density of  
8 stubby-, mushroom-, long thin- and filopodia-shaped spines on the basal  
9 dendrites of ACC pyramidal neurons in the above four groups (n = 23-30).  
10 Kruskal-Wallis *H* test with Nemenyi multiple comparisons test. Scale bar: 5  
11  $\mu\text{m}$  in (B). Data are presented as mean  $\pm$  S.E.M. See Supplemental Table 2 for  
12 detailed statistical information. \**P* < 0.5, \*\**P* < 0.01, \*\*\*\**P* < 0.0001.

13

14 **Supplemental Figure 7:** Detailed analysis of action potential (AP) properties,  
15 such as amplitude (A) (n = 5-6), threshold (B) (n = 5-6), half-width (C) (n = 8-  
16 11) and afterhyperpolarization (D) (n = 5-6) between mice expressing  
17 scrambled shRNA and shLamb1. Two-tailed unpaired t-test in (A) and (B).  
18 Mann Whitney *U* test in (C) and (D). Data are presented as mean  $\pm$  S.E.M. See  
19 Supplemental Table 2 for detailed statistical information.

20

21 **Supplemental Figure 8:** (A) Comparison of response frequency to von Frey  
22 hairs in the contralateral hindpaw in SNI-operated mice after intra-ACC injection

1 of pyrinintegrin (Pyr, 1 mM) vs vehicle (Veh) (n = 9). (B, C) Changes of  
2 mechanical threshold (B) and thermal latency (C) in the contralateral hindpaw  
3 in SNI-operated mice after delivery of Pyr vs Veh (n = 9). Two-tailed unpaired  
4 t-test. (D, E) Quantitative summary showing the time stay in the open arm (D)  
5 and total distance (E) in the EPM paradigm after intra-ACC administration of  
6 Pyr vs Veh in SNI-operated mice (n = 8). Two-tailed unpaired t-test in (D). Mann  
7 Whitney *U* test in (E). (F-H) Typical immunoblots and quantitative summary  
8 showing knockdown of integrin  $\beta$ 1 (F) in the ACC caused a reduction in  
9 phosphorylation of Src (G) and increase in phosphorylation of cofilin (H), which  
10 were both eliminated by intracingulate delivery of pyrinintegrin (1 mM) (n = 3).  
11 One-way ANOVA with Tukey's multiple comparisons test. Data are presented  
12 as mean  $\pm$  S.E.M. See Supplemental Table 2 for detailed statistical information.  
13 \**P* < 0.5, \*\**P* < 0.01, \*\*\*\**P* < 0.0001.

14

15 **Supplementary Figure 9:** (A, B) Quantitative summary showing the  
16 comparable total traveling distance in the OFT (A) and EPM (B) paradigm in  
17 control and CORT-treated mice (n= 6). (C, D) Quantitative summary showing  
18 the comparable total traveling distance in the OFT (C) and EPM (D) paradigm  
19 in control and CRS-treated mice (n= 6). Two-tailed unpaired t-test. Data are  
20 presented as mean  $\pm$  S.E.M. See Supplemental Table 2 for detailed statistical  
21 information.

22



1 **Supplemental Figure 10:** Unilateral intraplantar surface injection of CFA  
2 induces exaggerated pain response and related anxiodepression. (A)  
3 Response frequency to von Frey hairs in the ipsilateral hindpaw at 7d after CFA  
4 inflammation (n = 10). (B, C) Magnitude of ipsilateral mechanical allodynia (B)  
5 and thermal hyperalgesia (C) in CFA-inflamed mice as compared to control  
6 group (n = 10). Two-tailed unpaired separate variance estimation t-test in (B).  
7 Two-tailed unpaired t-test in (C). (D) Quantitative summary of distance  
8 travelling in the open arm and total distance in the EPM paradigm at 14 d after  
9 CFA treatment as compared to control group (n = 9). Distance in open arm:  
10 One-way ANOVA with Tukey's multiple comparisons test. Total distance:  
11 Kruskal-Wallis *H* test. (E, F) Duration of immobility in TST (E) and sucrose  
12 preference in SPT paradigm (F) at 14 d after CFA inflammation in comparison  
13 with control mice (n = 7-9). One-way ANOVA with Tukey's multiple comparisons  
14 test in (E). Two-tailed unpaired t-test in (F). (G) Representative immunoblots  
15 and quantitative summary showing CFA inflammation induced dramatic  
16 downregulation of Lamb1 in the contralateral ACC (n = 5). Two-tailed unpaired  
17 t-test. Data are presented as mean  $\pm$  S.E.M. See Supplemental Table 2 for  
18 detailed statistical information. \**P* < 0.5, \*\**P* < 0.01, \*\*\*\**P* < 0.0001.

19

20 **Supplemental Figure 11:** The change of ACC LAMB1 in SNI did not show sex  
21 difference. Typical blots (A) and quantitative summary (B) showing that in  
22 female mice, LAMB1 in the ACC also displayed significant downregulation

1 following SNI, indicative of no sex difference in LAMB1 role in the neuropathic  
2 pain and related anxiodepression (n = 6). One-way ANOVA with Tukey's  
3 multiple comparisons test. Data are presented as mean  $\pm$  S.E.M. See  
4 Supplemental Table 2 for detailed statistical information. \*\* $P < 0.01$ , \*\*\*\* $P <$   
5 0.0001.  
6

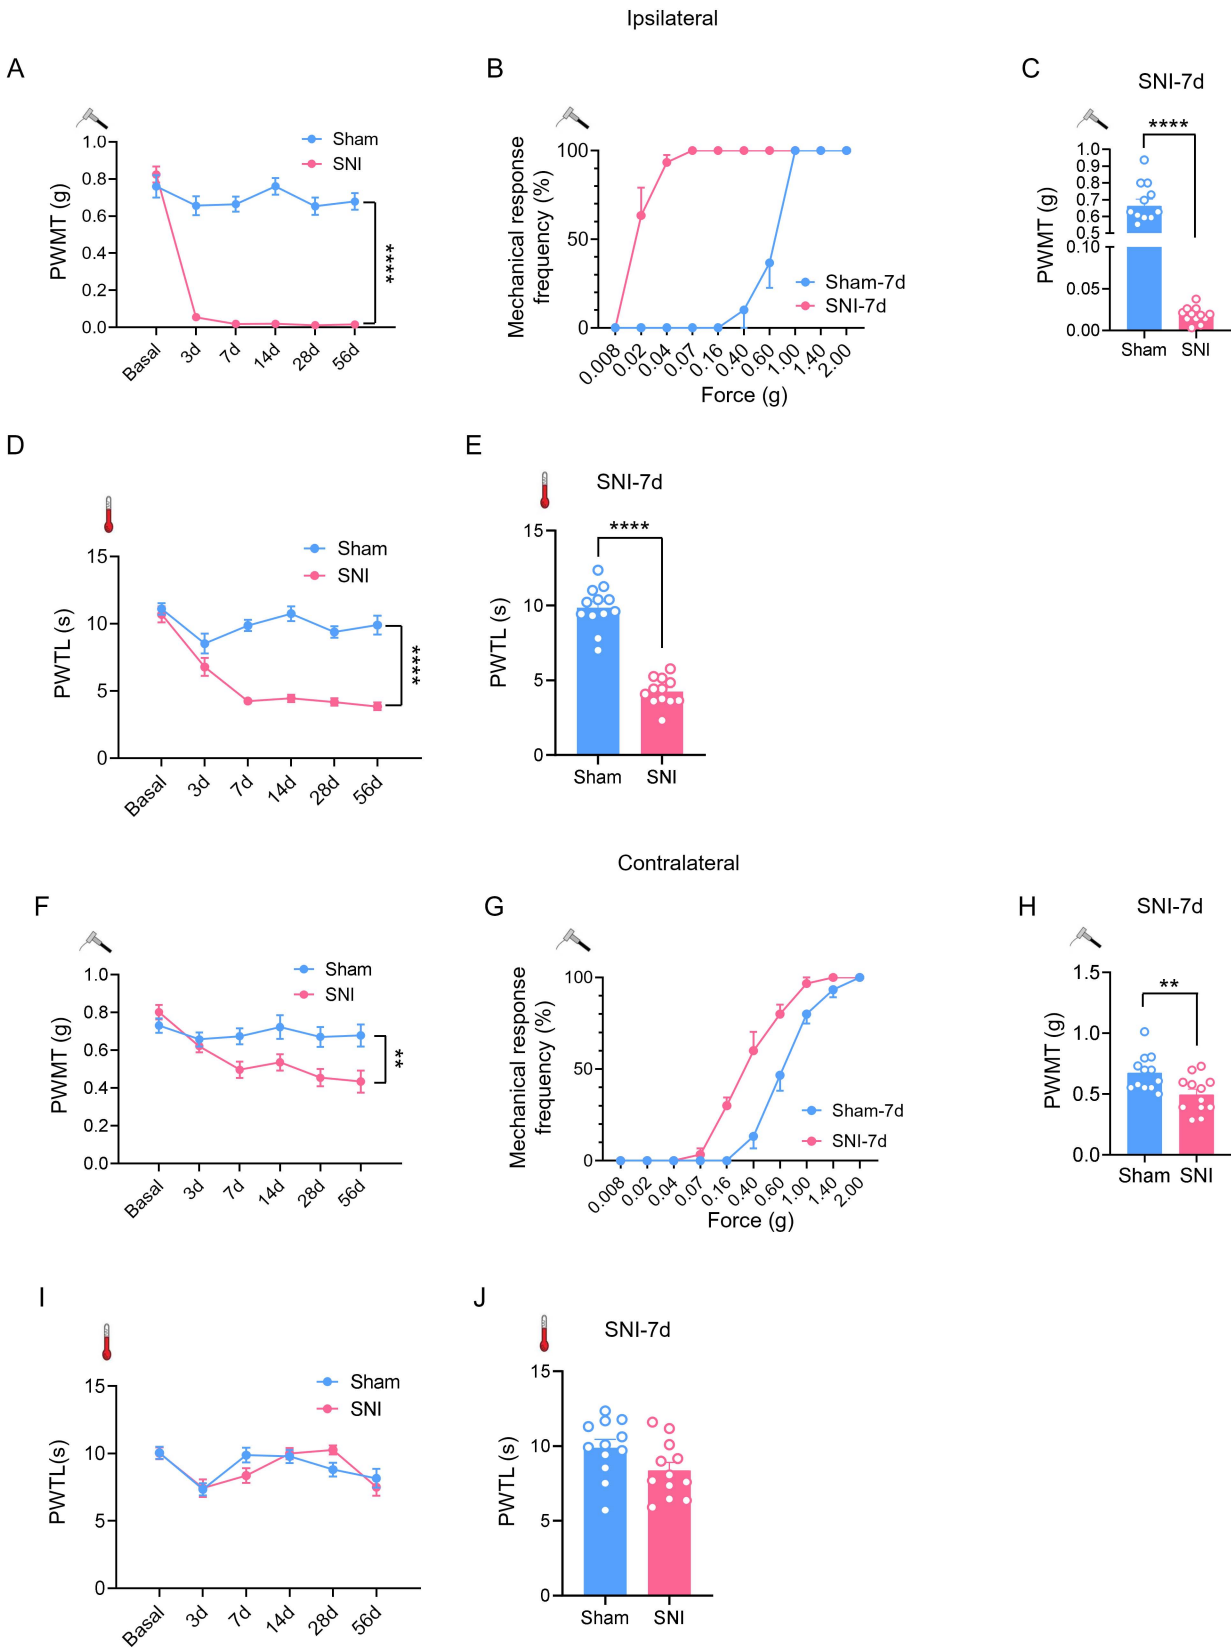

## OFT

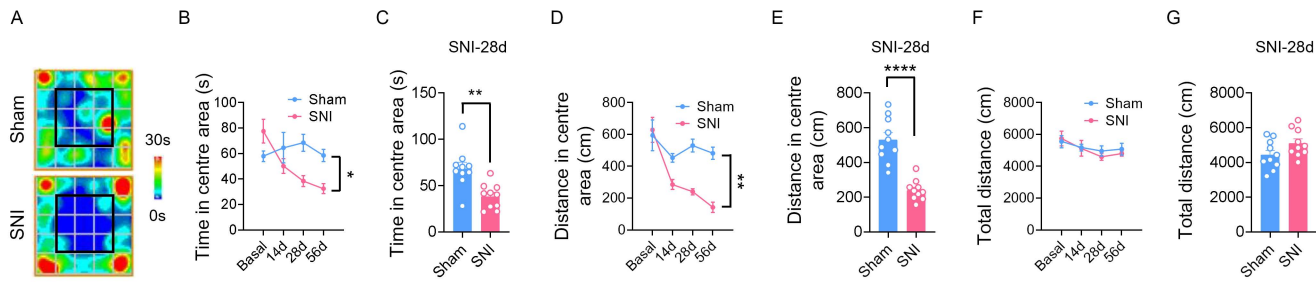

## EPM

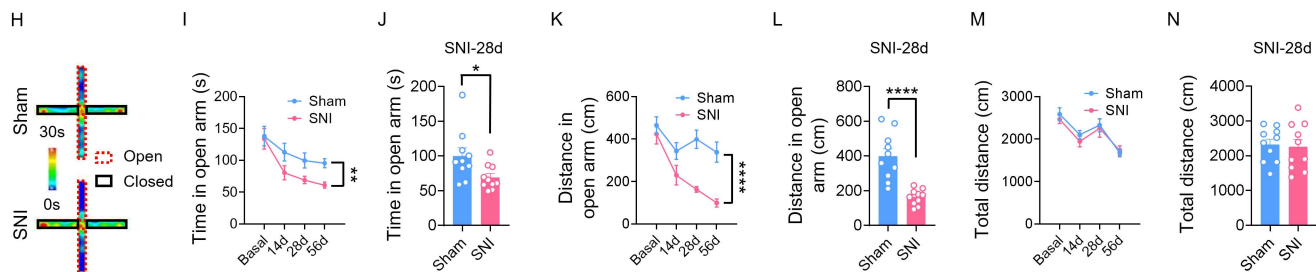

## TST

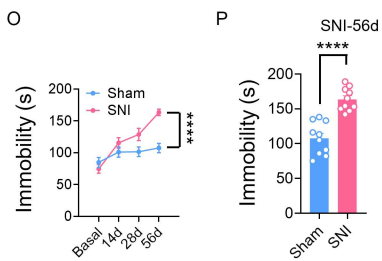

## SPT

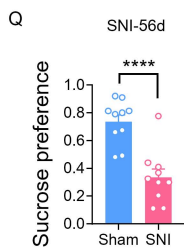

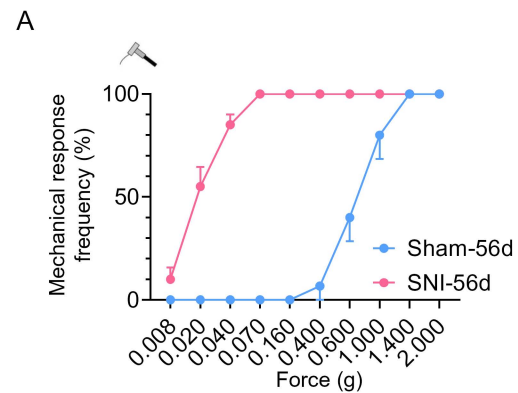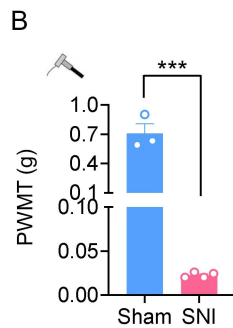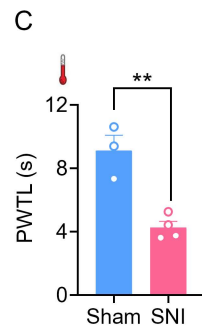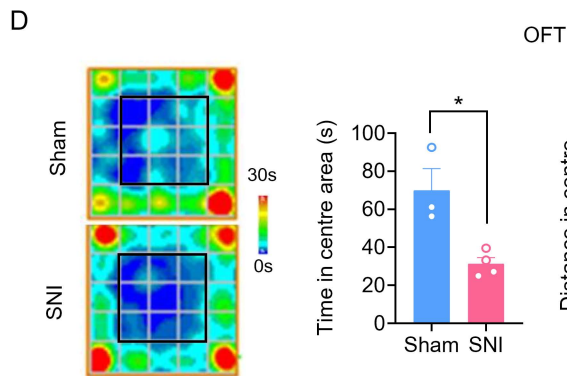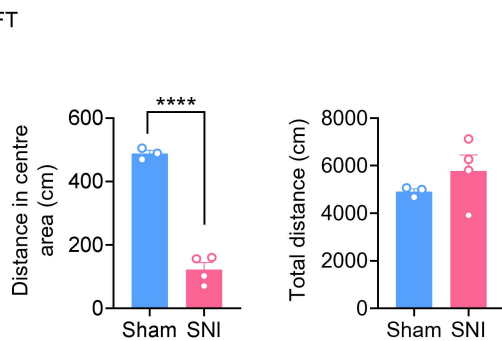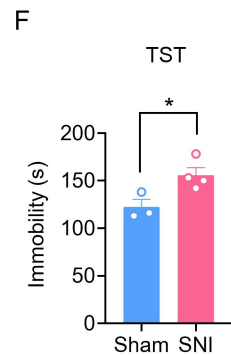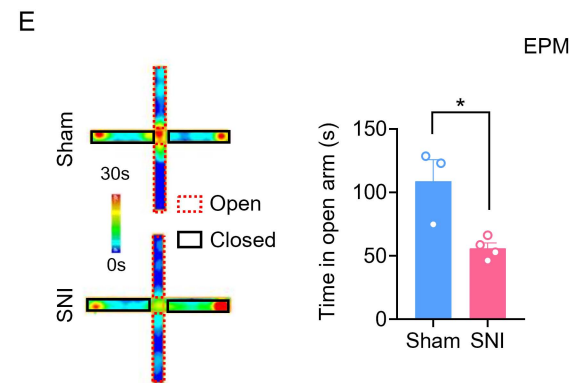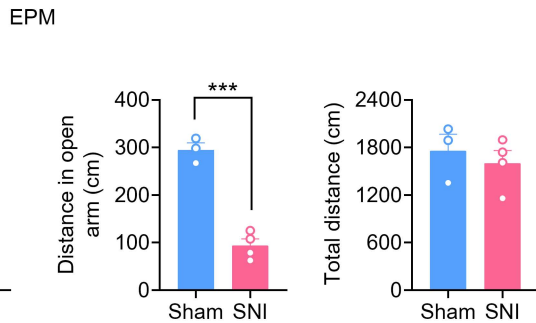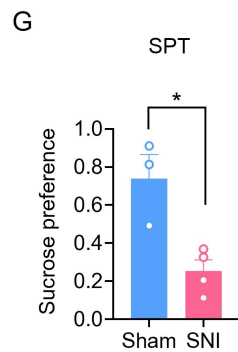

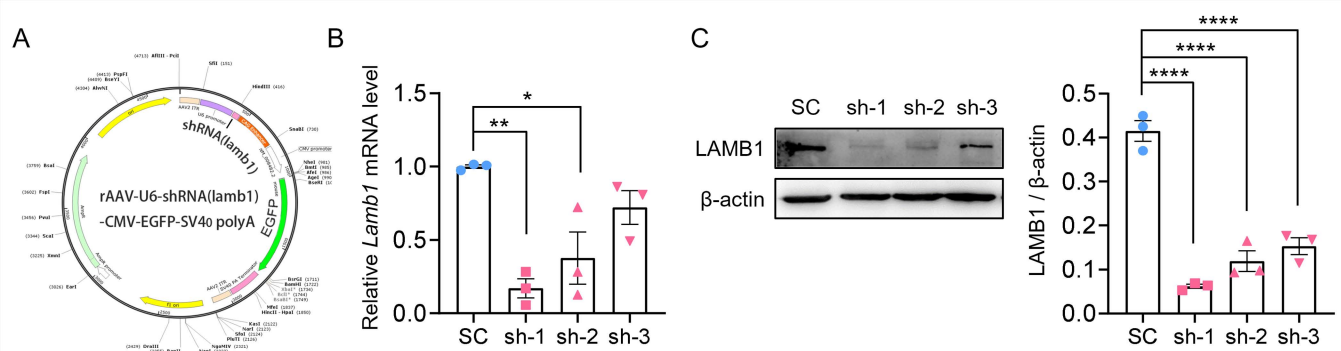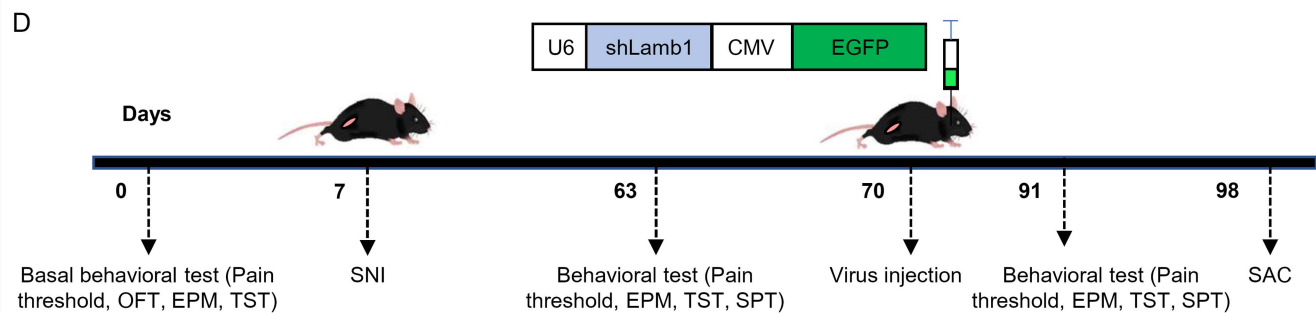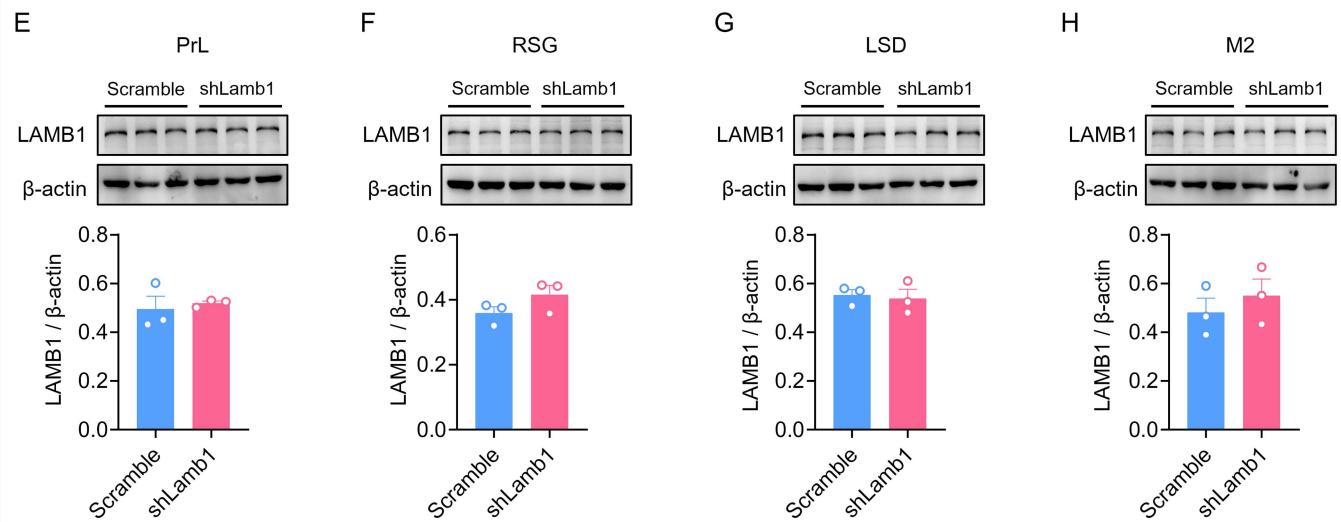

Contralateral

A

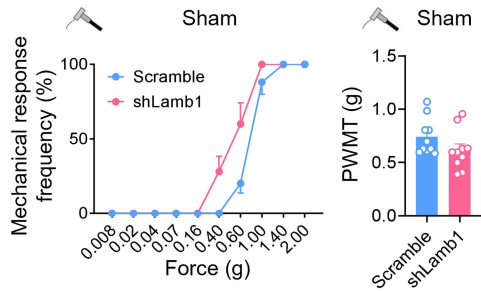

B

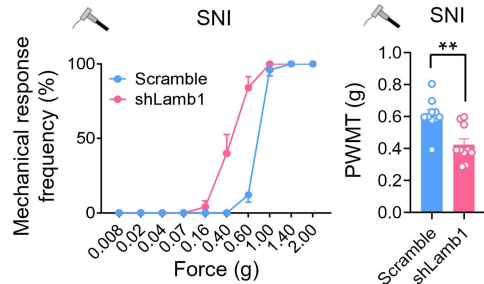

C

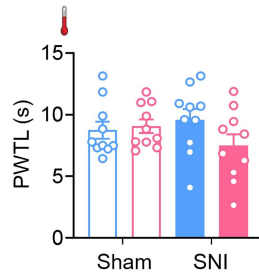

EPM

D

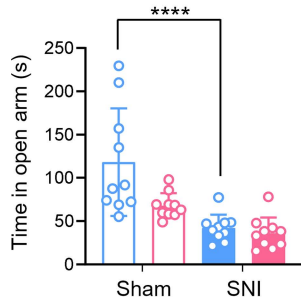

E

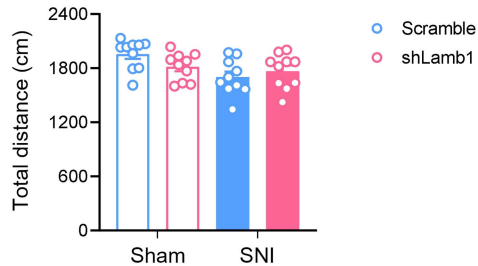

A

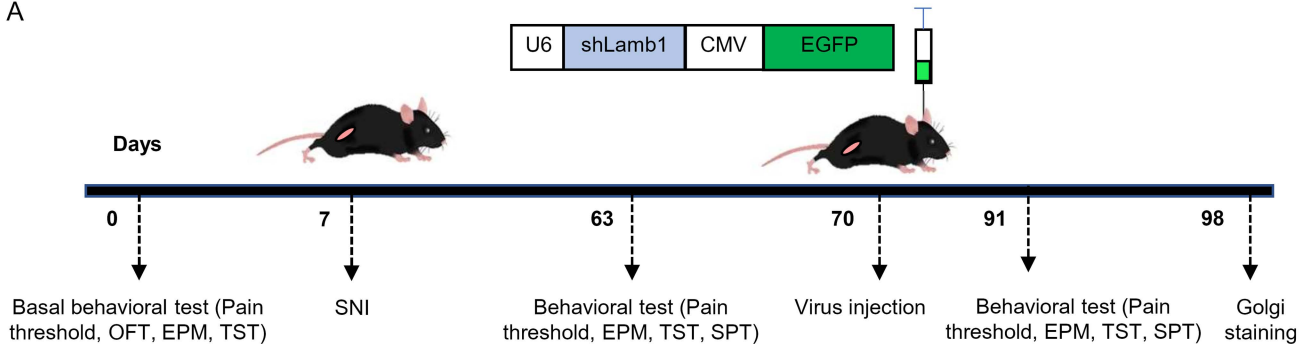

B

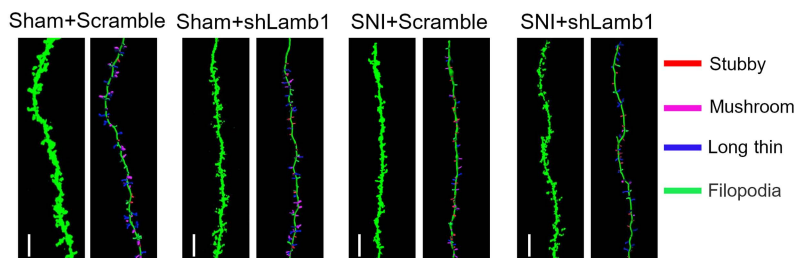

C

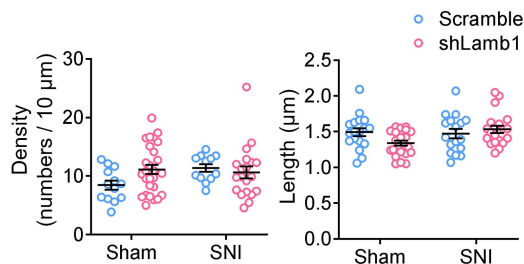

D

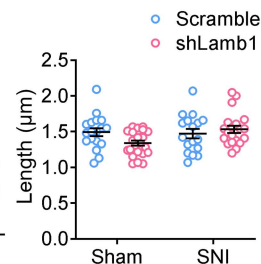

E

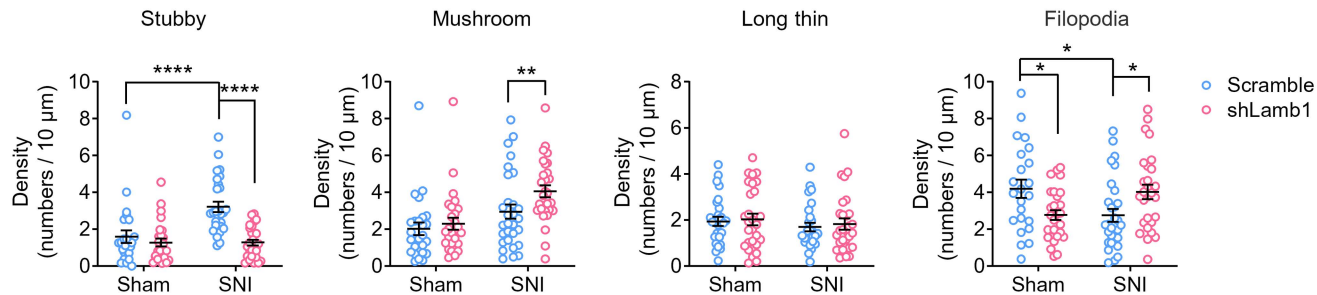



A

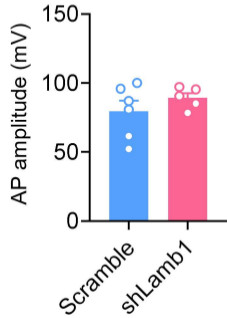

B

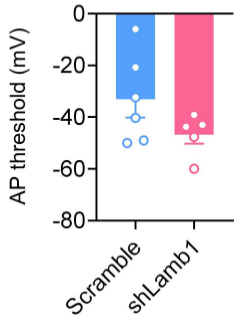

C

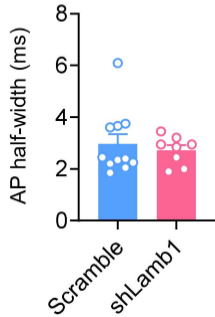

D

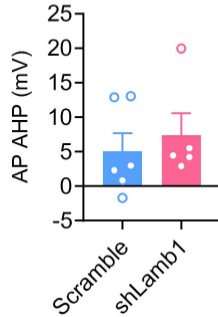

Contralateral

A

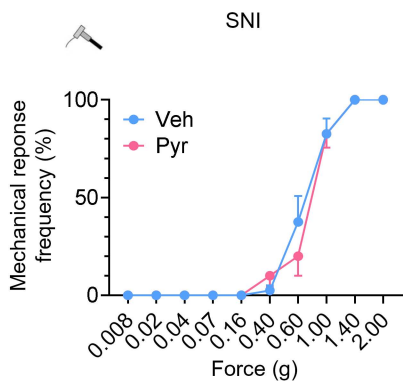

B

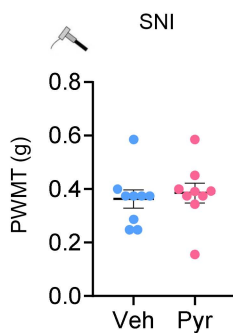

C

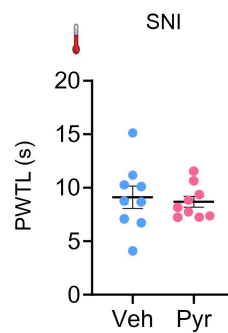

D

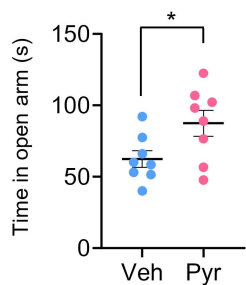

E

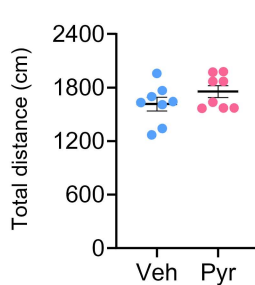

F

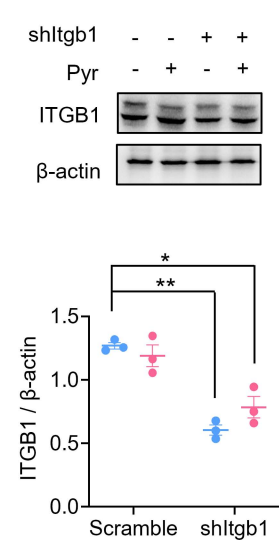

G

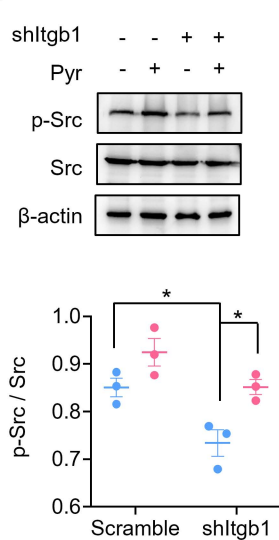

H

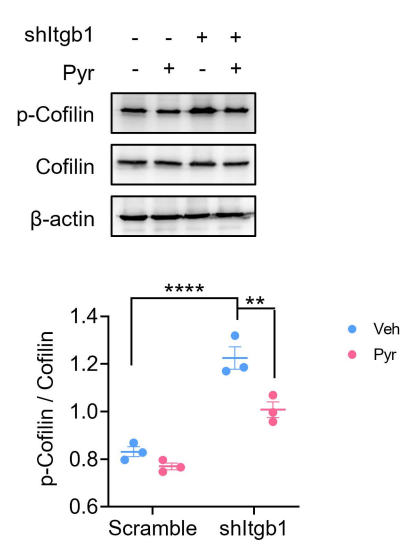

A

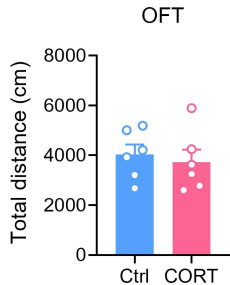

B

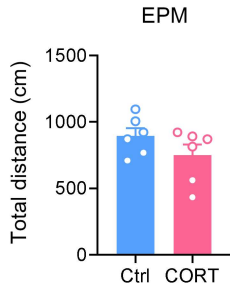

C

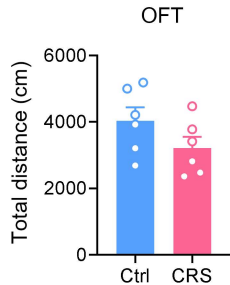

D

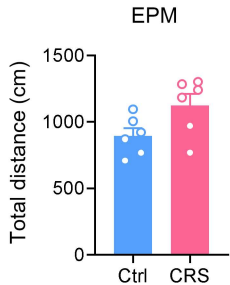

A

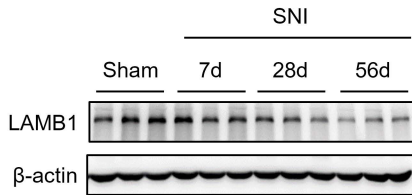

B

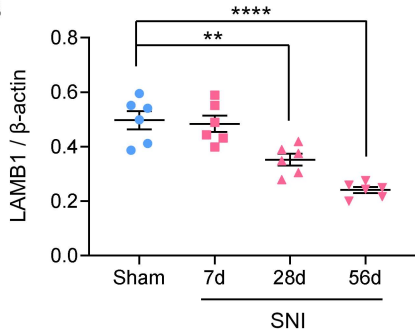

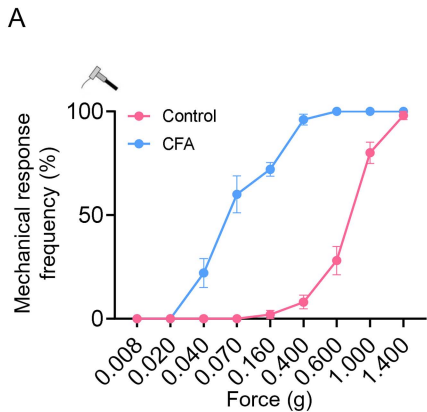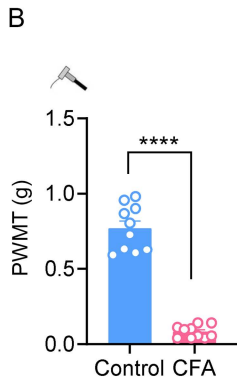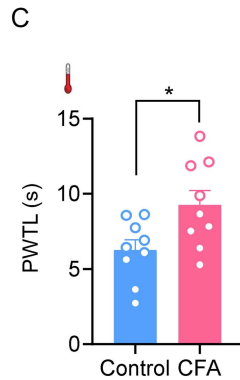

**D** EPM

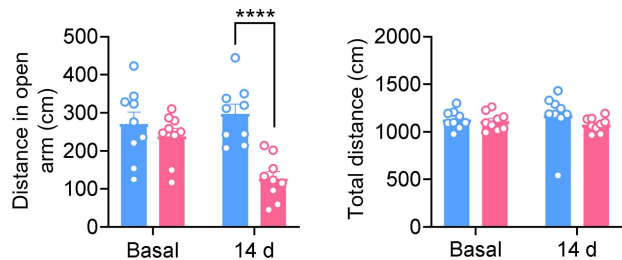

**E** TST

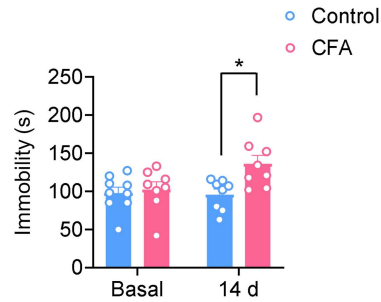

**F** SPT

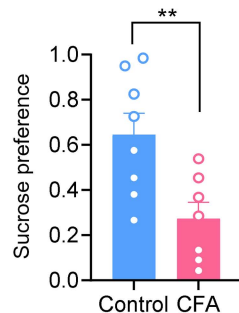

**G**

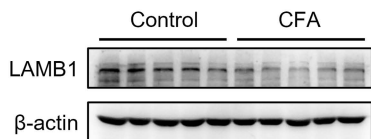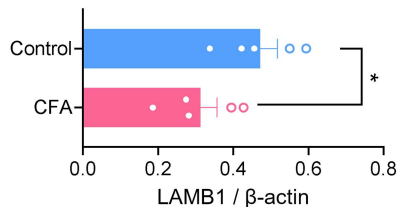

Supplement: jci-131-146323-s051.pdf [file jci-131-146323-s051.pdf]
