# Supplementary material
Source: PubMed Central journal article supplement (PMC8321574)
Supplement: jci-131-146323-s052.pdf [file jci-131-146323-s052.pdf]

## KEY RESOURCES TABLE

| REAGENT or RESOURCE                | SOURCE                                     | IDENTIFIER | Dilution                              |
|------------------------------------|--------------------------------------------|------------|---------------------------------------|
| Antibodies                         |                                            |            |                                       |
| Rabbit anti-Lamb1                  | Proteintech, Wuhan, China                  | 23498-1-AP | 1:500 (WB)<br>1:200 (IF)<br>1:50 (IP) |
| rabbit anti-Cofilin                | Proteintech, Wuhan, China                  | 10960-1-AP | 1:1000 (WB)                           |
| Rabbit anti-Integrin $\beta$ 1     | Proteintech, Wuhan, China                  | 12594-1-AP | 1:1000 (WB)                           |
| Rabbit anti- LIMK2                 | Proteintech, Wuhan, China                  | 12350-1-AP | 1:1000 (WB)                           |
| Mouse anti- $\beta$ -actin         | Proteintech, Wuhan, China                  | 66009-1-AP | 1:4000 (WB)                           |
| Mouse anti-GAPDH                   | Proteintech, Wuhan, China                  | 60004-1-Ig | 1:4000 (WB)                           |
| Rabbit anti-Flotillin1             | Proteintech, Wuhan, China                  | 15571-1-AP | 1:1000 (WB)                           |
| Rabbit anti-NR1                    | Abcam, Cambridgeshire, UK                  | ab17345    | 1:1000 (WB)                           |
| Rabbit anti-NR2B                   | Abcam, Cambridgeshire, UK                  | ab65783    | 1:1000 (WB)                           |
| Rabbit anti-RhoGAP                 | Abcam, Cambridgeshire, UK                  | ab32328    | 1:500 (WB)                            |
| Rabbit anti-RhoA                   | Abcam, Cambridgeshire, UK                  | ab187027   | 1:5000 (WB)                           |
| Rabbit anti-ROCK2                  | Abcam, Cambridgeshire, UK                  | ab125025   | 1:10000 (WB)                          |
| Mouse anti-Phosphotyrosine         | Abcam, Cambridgeshire, UK                  | ab269515   | 1:5000 (WB)<br>1:50 (IP)              |
| Rabbit anti-GluR1                  | Abcam, Cambridgeshire, UK                  | ab183797   | 1:1000 (WB)                           |
| Rabbit anti-GluR2                  | Abcam, Cambridgeshire, UK                  | ab206293   | 1:1000 (WB)                           |
| Rabbit anti-cofilin (Phospho-Ser3) | Signalway, College Park, MD, USA           | 11139      | 1:1000 (WB)                           |
| Mouse anti-LIMK-1                  | SANTA CRUZ, Dallas, TX, USA                | sc-515585  | 1:1000 (WB)                           |
| Rabbit anti-Src                    | Cell Signaling Technology, Boston, MA, USA | 2109       | 1:1000 (WB)                           |
| Rabbit anti-Phospho-Src (Tyr416)   | Cell Signaling Technology, Boston, MA, USA | 6943       | 1:1000 (WB)                           |

|                                                                                       |                                            |           |             |
|---------------------------------------------------------------------------------------|--------------------------------------------|-----------|-------------|
| Rabbit anti-PSD95                                                                     | GeneTex, San Antonio, TX, USA              | GTX133255 | 1:1000 (WB) |
| Mouse anti-NeuN                                                                       | Abcam, Cambridgeshire, UK                  | ab104224  | 1:200 (IF)  |
| Mouse anti-GFAP                                                                       | Abcam, Cambridgeshire, UK                  | ab4648    | 1:200 (IF)  |
| Goat anti-Iba1                                                                        | Abcam, Cambridgeshire, UK                  | ab5076    | 1:200 (IF)  |
| Mouse anti-CaMKII                                                                     | Abcam, Cambridgeshire, UK                  | ab22609   | 1:200 (IF)  |
| Mouse anti-GAD67                                                                      | Abcam, Cambridgeshire, UK                  | ab26116   | 1:200 (IF)  |
| Anti-rabbit IgG,HRP-linked Antibody                                                   | Cell Signaling Technology, Boston, MA, USA | 7074      | 1:4000 (WB) |
| Anti-mouse IgG,HRP-linked Antibody                                                    | Cell Signaling Technology, Boston, MA, USA | 7076      | 1:4000 (WB) |
| Goat anti-Rabbit IgG (H+L) Highly Cross-Adsorbed Secondary Antibody, Alexa            | Invitrogen, Carlsbad, CA, USA              | A11034    | 1:800 (IF)  |
| Donkey anti-Mouse IgG (H+L) Highly Cross-Adsorbed Secondary Antibody, Alexa Fluor 594 | Invitrogen, Carlsbad, CA, USA              | A21203    | 1:800 (IF)  |
| Donkey anti-Goat IgG (H+L) Cross-Adsorbed Secondary Antibody, Alexa Fluor 594         | Invitrogen, Carlsbad, CA, USA              | A11058    | 1:800 (IF)  |

#### Chemicals, Peptides and Recombinant Proteins

|                |                                   |          |             |
|----------------|-----------------------------------|----------|-------------|
| Hoechst        | Sigma-Aldrich, St. Louis, MO, USA | 94403    | 1:1000 (IF) |
| Phalloidin     | Solarbio, Beijing, China          | CA1670   | 1:100 (IF)  |
| Pyrintegrin    | MCE, Monmouth Junction, NJ, USA   | HY-13306 | 1 mM        |
| Corticosterone | Solarbio, Beijing, China          | C9480    | 0.1 mg/ml   |
| NMDA           | Sigma-Aldrich, St. Louis, MO, USA | M3262    | 50 $\mu$ M  |
| AMPA           | Sigma-Aldrich, St. Louis, MO, USA | A6816    | 50 $\mu$ M  |
| QX314          | Sigma-Aldrich, St. Louis, MO, USA | L5783    | 5 mM        |
| AP5            | Sigma-Aldrich, St. Louis, MO, USA | A8054    | 50 $\mu$ M  |
| Picrotoxin     | Sigma-Aldrich, St. Louis, MO, USA | R284556  | 100 $\mu$ M |

|                                                |                                   |         |         |
|------------------------------------------------|-----------------------------------|---------|---------|
| complete Freund' s                             | Sigma-Aldrich, St. Louis, MO, USA | F5881   | 1 mg/ml |
| Virus Strains                                  |                                   |         |         |
| rAAV2/9-U6-shRNA(scramble)-CMV-EGFP-SV40pA     | BrainVTA, Wuhan, China            | PT-0916 |         |
| rAAV2/9-U6-shRNA (Lamb1)-CMV-EGFP-SV40pA       | BrainVTA, Wuhan, China            | PT-2272 |         |
| LV-U6-shRNA (Scramble)-CMV-EGFP-WPRE           | BrainVTA, Wuhan, China            | LV-0141 |         |
| LV-U6-shRNA (Lamb1)-CMV-EGFP-WPRE              | BrainVTA, Wuhan, China            | LV-0314 |         |
| rAAV2/9-U6-shRNA (scramble)-CMV-mCherry-SV40pA | BrainVTA, Wuhan, China            | PT-0923 |         |
| rAAV2/9-U6-shRNA (Lamb1)-CMV-mCherry-SV40pA    | BrainVTA, Wuhan, China            | PT-2329 |         |
| rAAV2/9-CaMKIIa-GCaMP6s-WPRE-pA                | BrainVTA, Wuhan, China            | PT-0110 |         |
| rAAV2/9-U6-shRNA(ITGB1)-CMV-mCherry-SV40pA     | BrainVTA, Wuhan, China            | PT-3567 |         |
